# Supplementary material for: A two-dimensional MXene potentiates a therapeutic microneedle patch for photonic implantable medicine in the second NIR biowindow
Source: Royal Society of Chemistry journal article supplement (doi:10.1039/d0nr01444c), 2020-01-01
Supplement: d0nr01444c1.pdf [file d0nr01444c1.pdf]

## Supporting information

### **Two-Dimensional MXene Potentiates Therapeutic Microneedle Patch for Photonic Implantable Medicine in The Second NIR Biowindow**

Shiyang Lin,<sup>1,3</sup> Han Lin,<sup>3\*</sup> Mai Yang,<sup>1,3</sup> Min Ge,<sup>3</sup> Yu Chen<sup>2,3\*</sup> and Yufang Zhu<sup>1,3\*</sup>

<sup>1</sup>School of Materials Science and Engineering, University of Shanghai for Science and Technology,  
Shanghai 200093, P. R. China. Email: zjf2412@163.com (Y. Zhu).

<sup>2</sup>School of Life Sciences, Shanghai University, Shanghai 200444, P. R. China. Email:  
chenyuedu@shu.edu.cn (Y. Chen).

<sup>3</sup>State Key Laboratory of High Performance Ceramics and Superfine Microstructure, Shanghai  
Institute of Ceramics, Chinese Academy of Sciences, Shanghai, 200050, P. R. China. E-mail:  
linhan@mail.sic.ac.cn (H. Lin); chenyu@mail.sic.ac.cn (Y. Chen).

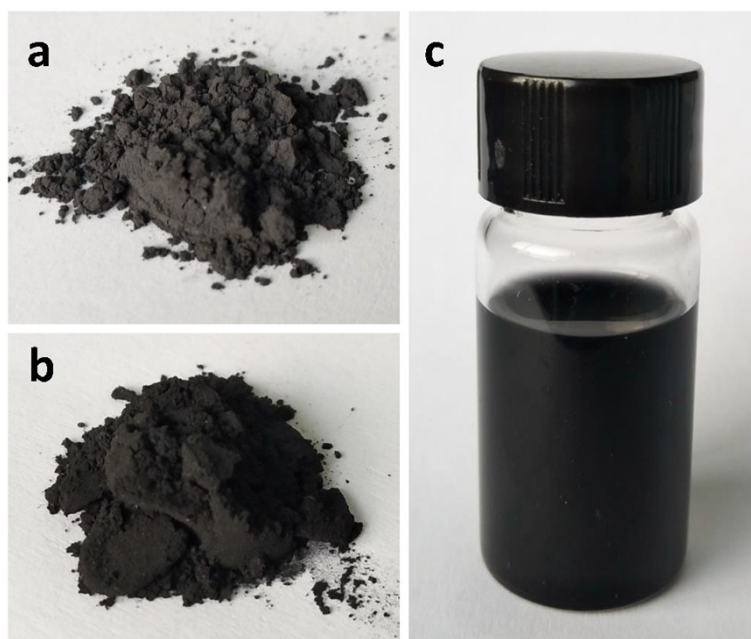

**Fig. S1** Photographs of (a)  $\text{Nb}_2\text{AlC}$  ceramic bulk powder, (b)  $\text{Nb}_2\text{C}$  powder and (c) 2D  $\text{Nb}_2\text{C}$  MXene aqueous solution.

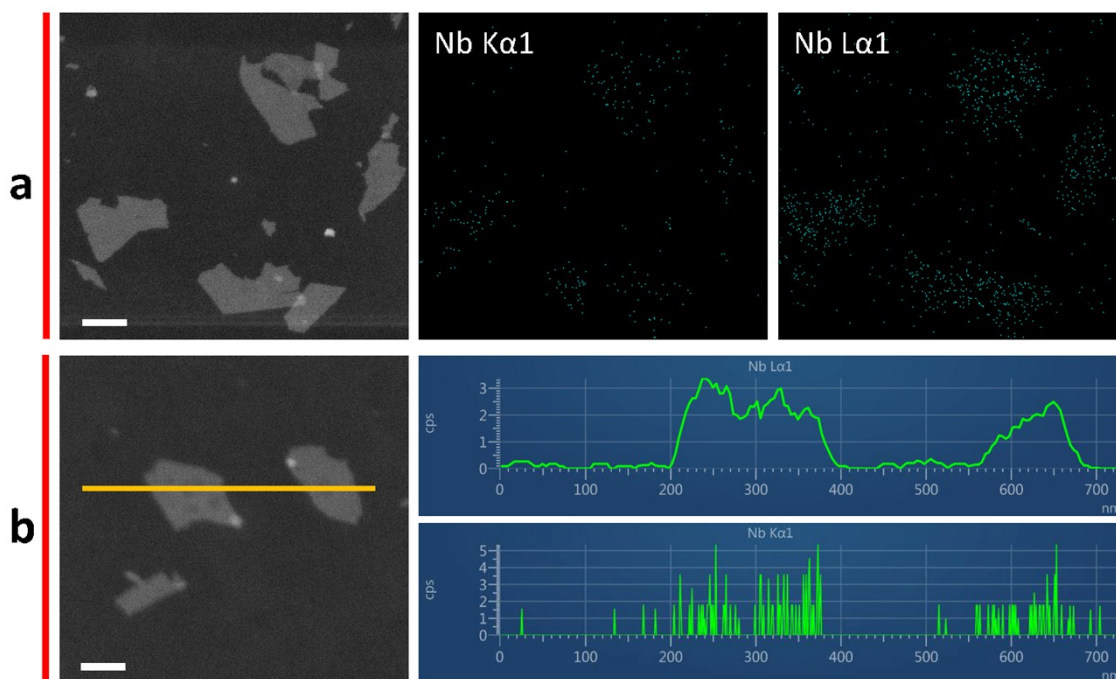

**Fig. S2** EDS analysis of the formed 2D Nb<sub>2</sub>C nanosheets. (a) Elemental mapping and (b) element-linear scanning of Nb. Scale bar: 100 nm.

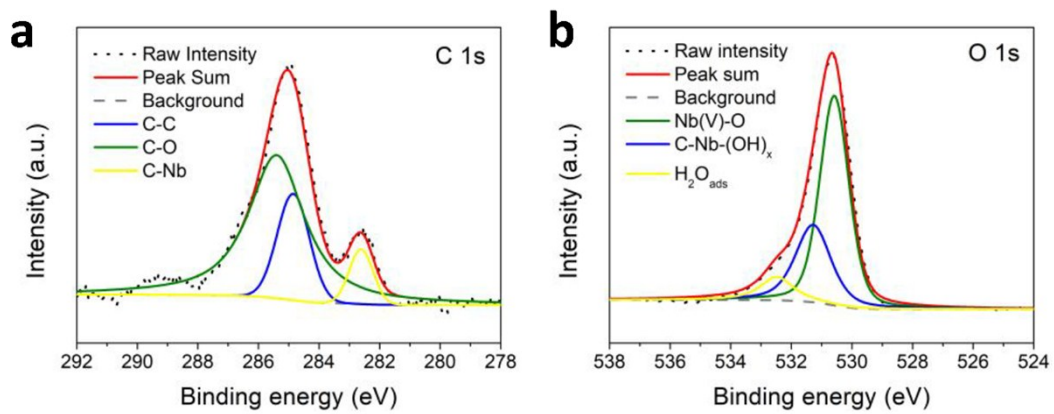

**Fig. S3** XPS spectra of the formed Nb<sub>2</sub>C in the region of (a) C 1s, (b) O 1s.

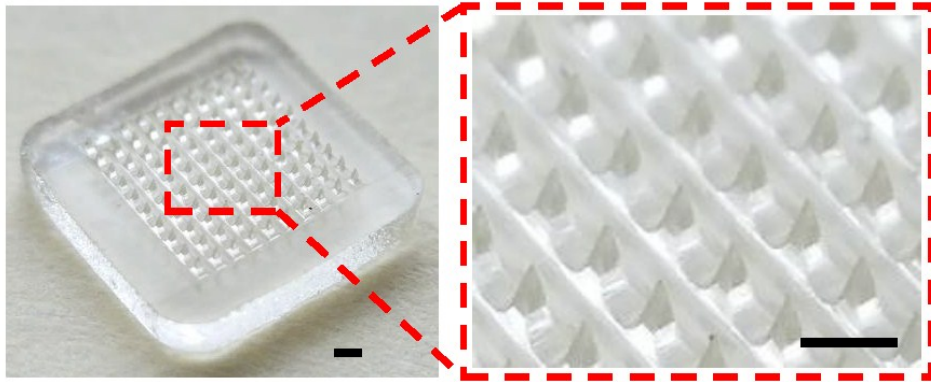

**Fig. S4** Representative morphology of PVP-only MN's array. Scale bar: 500  $\mu\text{m}$ .

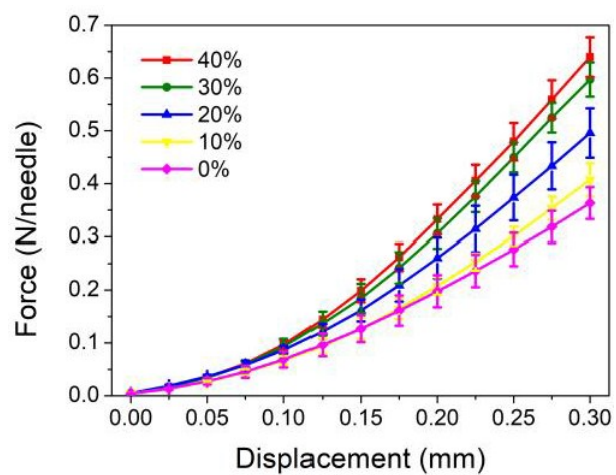

**Fig. S5** Compressive strength of MNs with different Nb<sub>2</sub>C contents (0%, 10%, 20%, 30%, and 40%)

(n = 3).

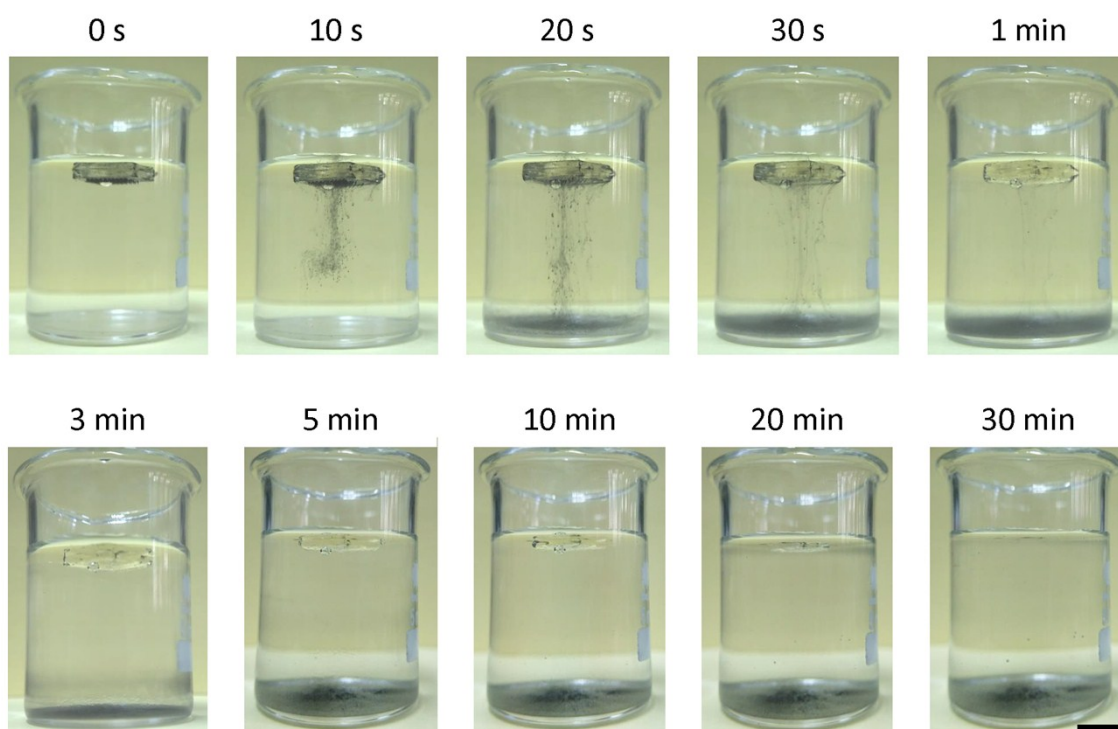

**Fig. S6** Dissolution photographs of a MN in PBS with prolonged durations (pH = 7.4). The temperature started at 37 °C, and later decreased slowly to room temperature. Scale bar: 5 mm.

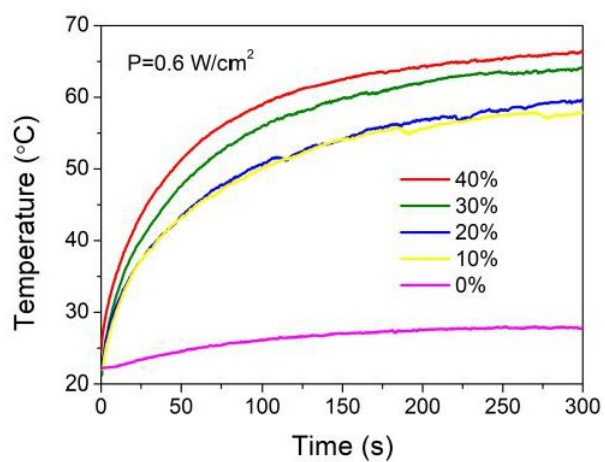

**Fig. S7** Temperature changes of MNs with different Nb<sub>2</sub>C contents (0%, 10%, 20%, 30%, and 40%) under irradiation of NIR laser (1064 nm) at a power density of 0.6 W/cm<sup>2</sup>.



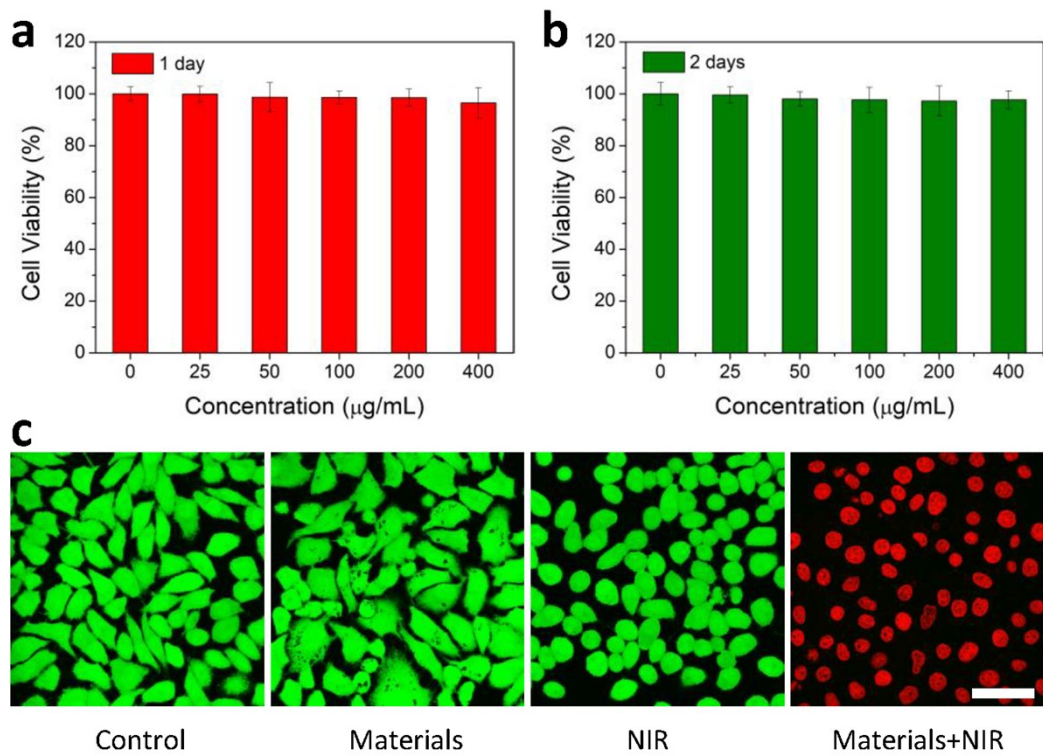

**Fig. S8** (a, b) Cytotoxicity assay of 1 day and 2 days for 4T1 cancer cells ( $n = 5$ ). (c) Confocal fluorescence imaging of 4T1 cancer cells after different treatments (Control, Materials, NIR, Materials+NIR). Scale bar: 50  $\mu\text{m}$ .

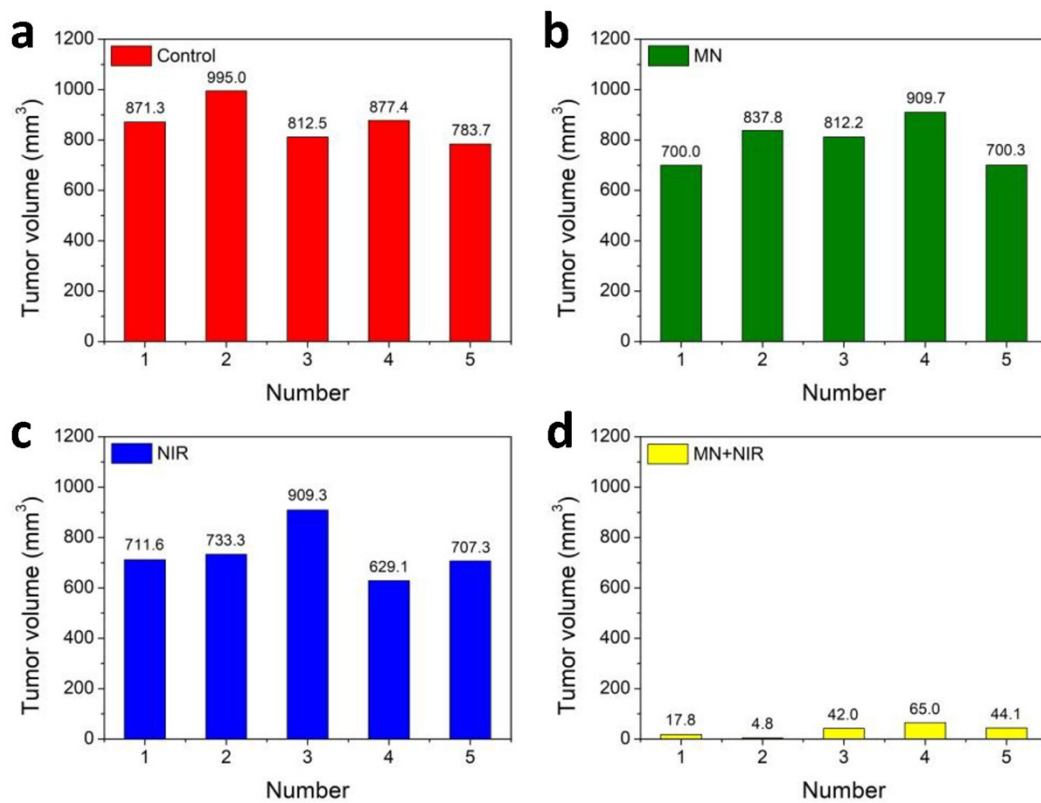

**Fig. S9** Tumor volumes of tumor-bearing mice in (a) Control group, (b) MN group, (c) NIR group, and (d) MN+NIR group after the whole treatment (5 mice per group).

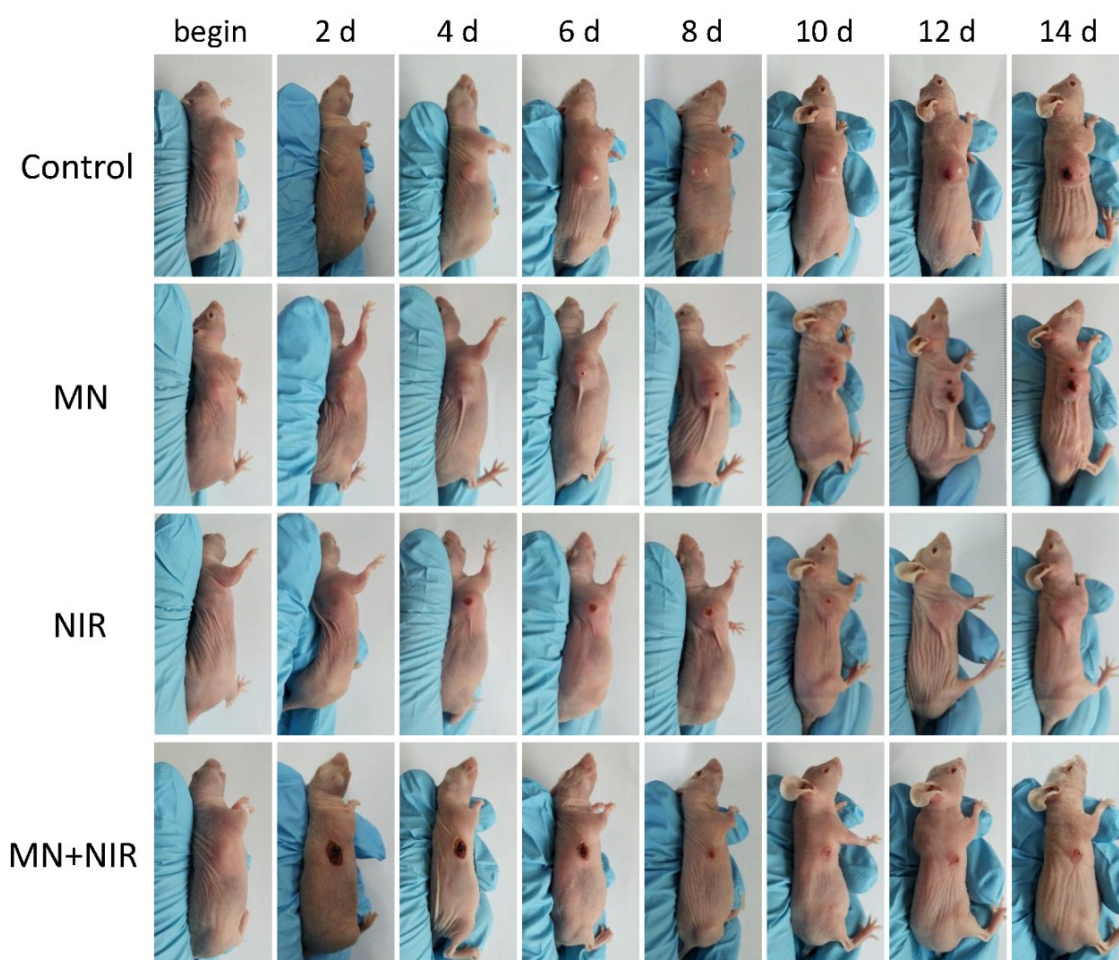

**Fig. S10** Representative images of tumor-bearing mice after different treatments during two-weeks period.
